# Supplementary material for: Statins and the Risk of Herpes Zoster: A Population-Based Cohort Study
Source: Oxford University Press journal article supplement (doi:10.1093/cid/cit745), 2013-11-13
Supplement: cit745_Supplementary_Data.zip [file cit745_Supplementary_Data.zip]

Archive with 1 entries (1 files):
- cit745supp.pdf
